# Supplementary material for: Protective role of TLR9‐induced macrophage/microglia phagocytosis after experimental intracerebral hemorrhage in mice
Source: PubMed Central journal article supplement (PMC9532915; doi:10.1111/cns.13919), 2022-07-25
Supplement: CNS-28-1800-s001.pdf [file CNS-28-1800-s001.pdf]

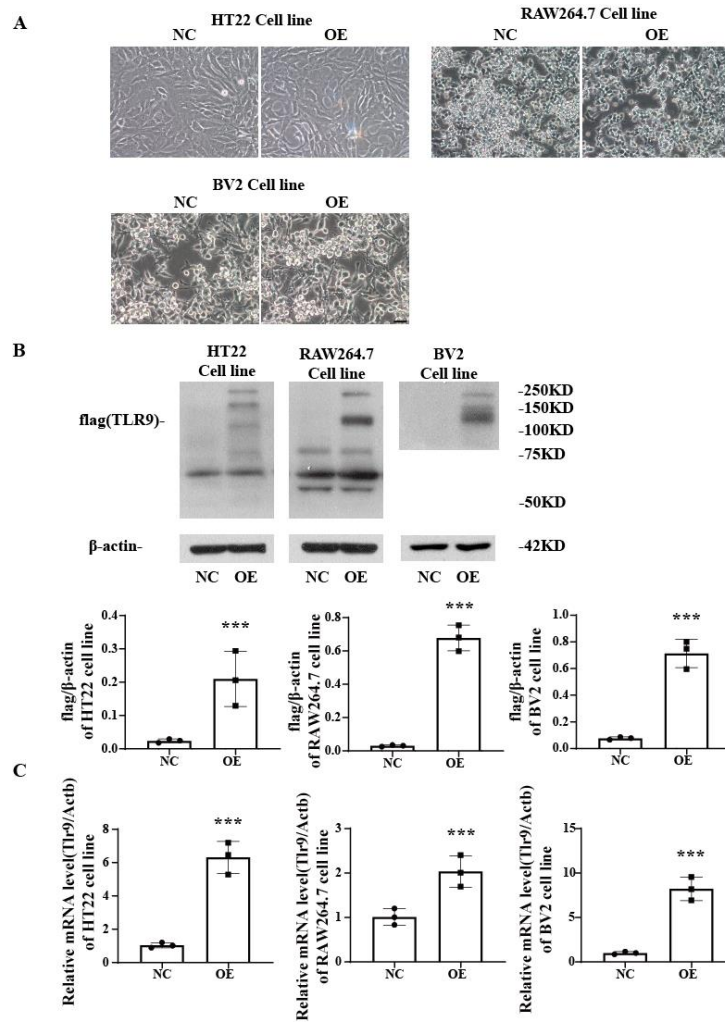

**Figure S1.** TLR9 overexpression cell lines verification. **A.** Morphology observation of BV2, RAW264.7 and HT22 cell lines with NC or OE lentivirus transfection. Scale bar=50 $\mu$ m. **B.** Western blot for Flag expression level of all three cell lines with different lentivirus. **c.** qPCR for relative TLR9 mRNA level of all three cell lines with different lentivirus. n=8 for each group. Values are mean  $\pm$  SD. \*\*\* $P$ <0.001 vs LV-NC group by student t test.

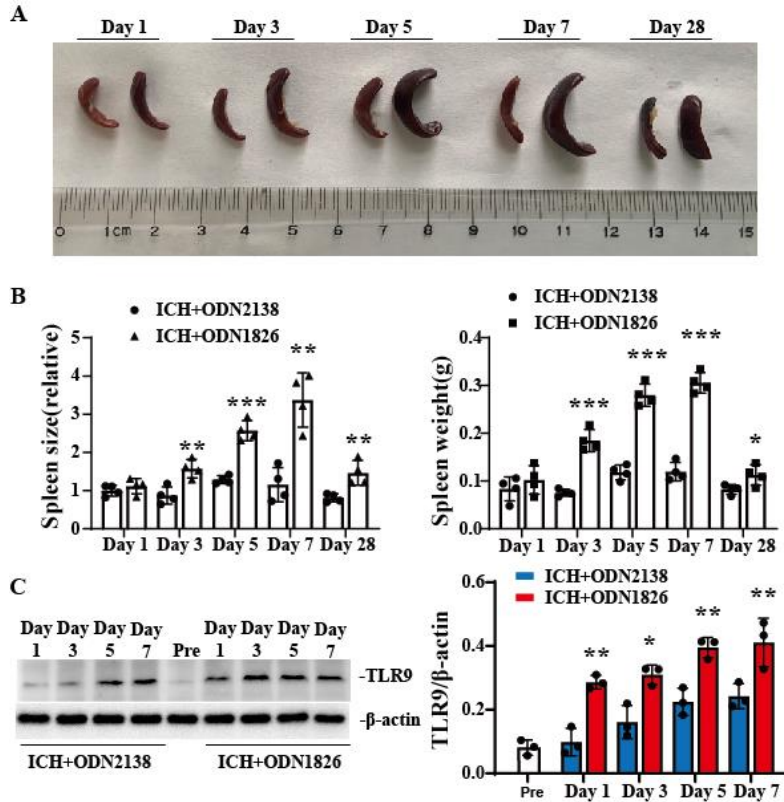

**Figure S2.** TLR9 activation of pharmacological intervention. **A.** Measurement of spleen size of male mice at day 1, day 3, day 5, day 7 and day 28 after ICH with ODN2138 or ODN1826 treatment. **B.** Spleen size and weight quantification of male mice at day 1, day 3, day 5, day 7 and day 28 after ICH with ODN2138 or ODN1826 treatment.  $n=8$  for each group. **C.** Western blot for TLR9 expression in ipsilateral BG of mice received ODN2138 or ODN1826 treatment at day 1, day 3, day 5 and day 7 after ICH.  $n=3$  for each group. Values are mean  $\pm$  SD. \* $P<0.05$ , \*\* $P<0.01$ , \*\*\* $P<0.001$  vs ICH+ODN2138 group by two-way ANOVA.

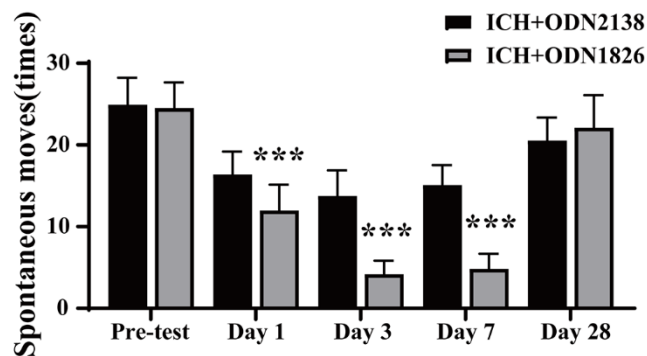

**Figure S3.** Spontaneous movement of ICH mice of each group.  $n=44$  for each group at day 1 and pre-test,  $n=33$  for each group at day 3,  $n=19$  for each group at day 7 and  $n=8$  for each group at day 28. Values are mean  $\pm$  SD. \*\*\* $P<0.001$  vs ICH+ODN2138 group by two-way ANOVA.

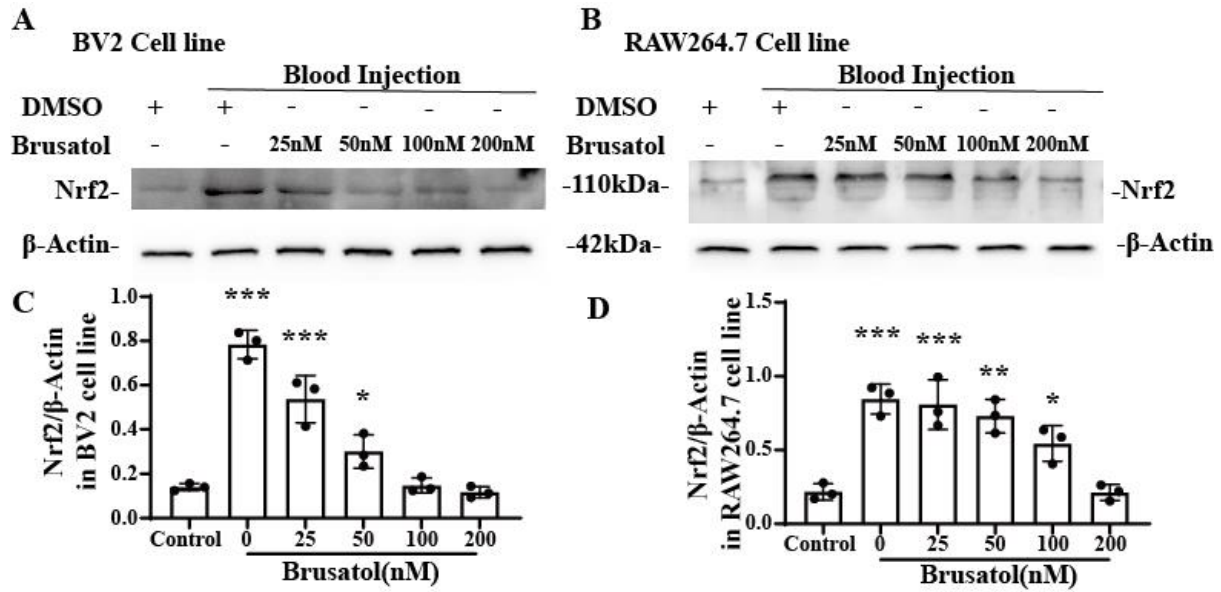

**Figure S4.** Brusatol concentration for Nrf2 inhibition in BV2 and RAW264.7 cell lines. **A.** Western blot for Nrf2 expression level under different Brusatol concentration in BV2 cells. **B.** Western blot for Nrf2 expression level under different Brusatol concentration in RAW264.7 cells.  $n=3$  for each group. Values are mean  $\pm$  SD. \* $P<0.05$ , \*\* $P<0.01$ , \*\*\* $P<0.001$  vs control group by two-way ANOVA.
